# Supplementary material for: Phase variation and microevolution at homopolymeric tracts in Bordetella pertussis
Source: PubMed Central journal article supplement (PMC1891110; doi:10.1186/1471-2164-8-122), 2007-05-17
Supplement: 1471-2164-8-122-S1.pdf [file 1471-2164-8-122-S1.pdf]

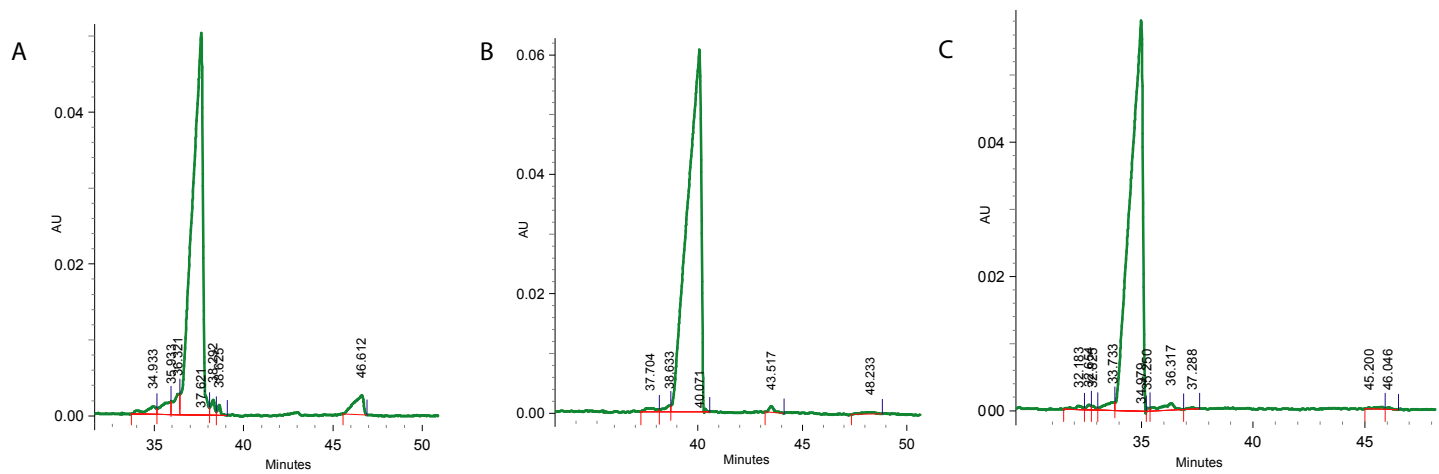

**Supplemental Figure 1. Capillary electrophoresis traces of HPLC-purified *bvgS* LDR oligonucleotides**  
HPLC-purified oligonucleotides were assayed for purity by capillary electrophoresis by the manufacturer (IDT). Elution time in minutes is plotted on the X-axis and absorbance units at 254 nm (AU) are plotted on the Y-axis. (A) *bvgS*-common, (B) *bvgS*-LDR-C7, (C) *bvgS*-LDR-C6.
