# Supplementary material for: Phase variation and microevolution at homopolymeric tracts in Bordetella pertussis
Source: PubMed Central journal article supplement (PMC1891110; doi:10.1186/1471-2164-8-122), 2007-05-17
Supplement: 1471-2164-8-122-S16.pdf [file 1471-2164-8-122-S16.pdf]

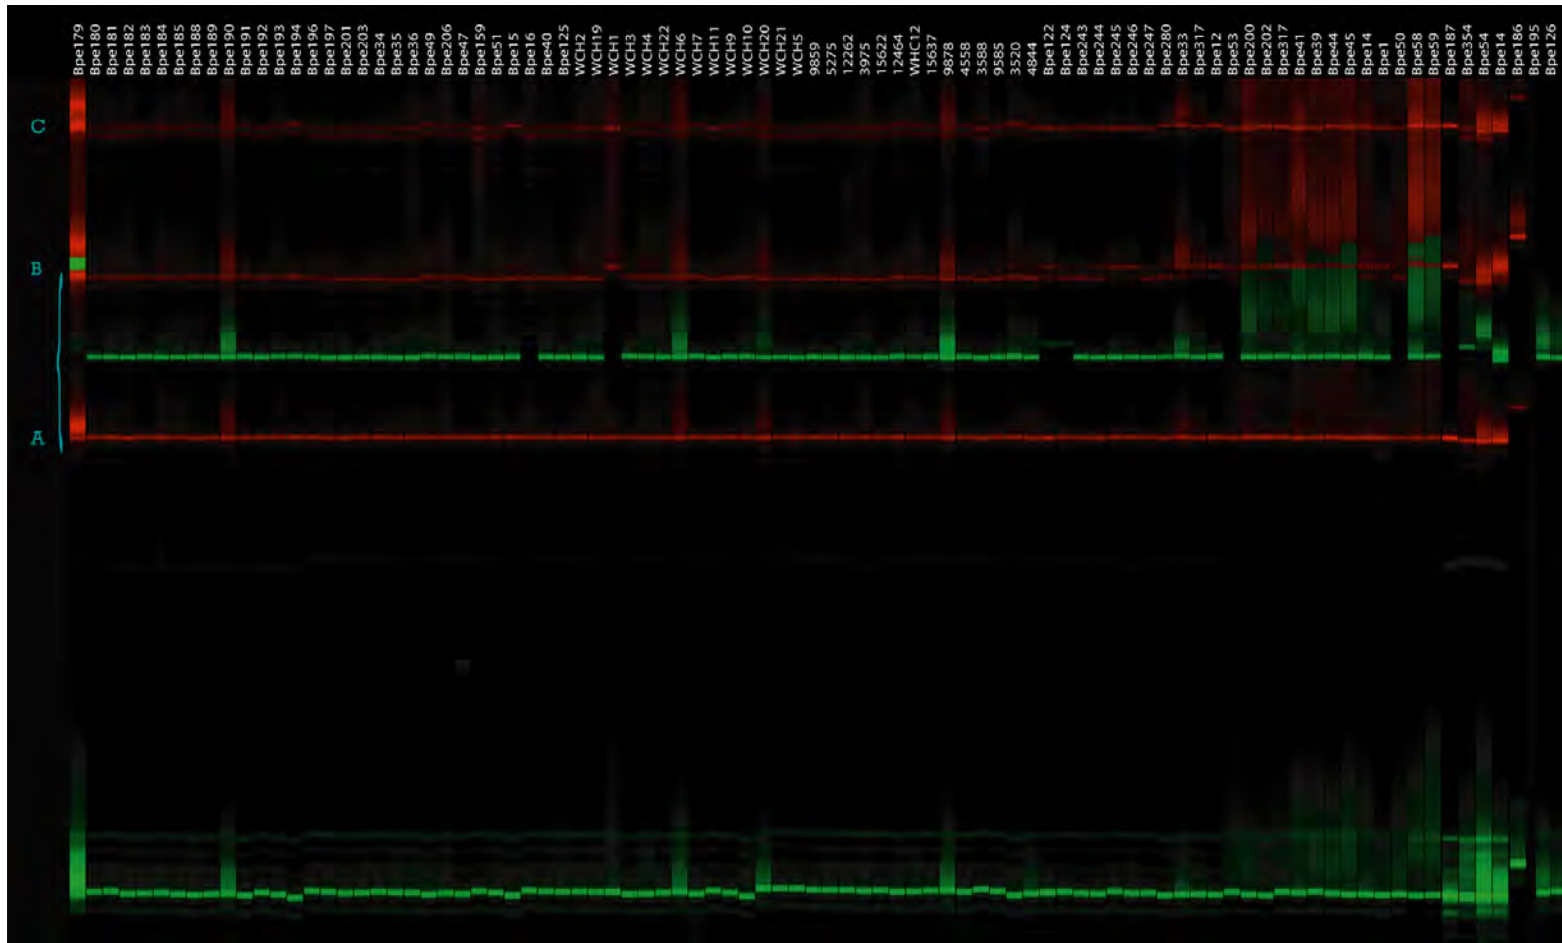

### Supplementary Figure 9. BP3651 PCR/LDR

Raw capillary electrophoresis data for ligation products from BP3651 uniplex PCR/LDR (green) and molecular weight standards (red) displayed as if an electrophoretic gel image, with higher molecular weight oligonucleotides closer to the top of the image. Unligated common oligonucleotide is near the bottom of the image, and ligation products are in the size range indicated by the bracket on the left. Each lane represents a single *B. pertussis* strain (indicated across top). Letters in teal indicate molecular weight standards: A, marker-51; B, marker-67; C, marker-80.
